# Supplementary material for: Transport of Veterinary Antibiotics in Farmland Soil: Effects of Dissolved Organic Matter
Source: MDPI journal article supplement (doi:10.3390/ijerph19031702), 2022-02-02
Supplement: s1 [file s1]

**Table S1.** Nature and parameters of DOM from various sources.

| Table S1. Nature and parameters of DOM from various sources.        |                     |                     |      |                                |                                                               |                                                                                                      |                                             |                                                  |           |           |           |           |           |
|---------------------------------------------------------------------|---------------------|---------------------|------|--------------------------------|---------------------------------------------------------------|------------------------------------------------------------------------------------------------------|---------------------------------------------|--------------------------------------------------|-----------|-----------|-----------|-----------|-----------|
| DOM Source                                                          |                     | Sample type         |      | DOC content                    | EEM-PARAFAC                                                   |                                                                                                      |                                             | Surrogate parameters of DOM/Fluorescence indices |           |           |           |           | Reference |
|                                                                     |                     |                     |      |                                | Ex/Em (nm)                                                    | Components                                                                                           | Proportion/order                            | SUVA <sub>254</sub>                              | Slope R   | FI        | HIX       | BIX       |           |
| Grassland amended soil with compost produced from urban green-waste | soil                | Soil solution       |      | 13.58–83.34 mg L <sup>-1</sup> | 330–350/420–440<br>240–260/420–480<br>270–280/300–340         | C1 - humic-like substances<br>C2 - fulvic acid-like<br>C3 - protein like                             | C1 > C2 > C3                                | N/A                                              | N/A       | 1.3       | 17.0–15.4 | 0.7       | [1]       |
| Agricultural soil and gravel aquifer systems                        | soil                | Extract with 2M KCl | with | 6.90–14.2 mg L <sup>-1</sup>   | 330–340/410–460<br>270–290/320–360<br>270–280/294–302         | C1- fulvic-like<br>C2 - tryptophan like<br>C3 - tyrosine-like                                        | C1 > C2 > C3                                | NA                                               | 0.46–0.61 | 1.42      | 9.06      | 0.54      | [2]       |
| Crop straws                                                         |                     | Extract water       | with | 779–857 mg L <sup>-1</sup>     | NA                                                            | NA                                                                                                   | NA                                          | 0.728                                            | N/A       | 1.5–1.7   | 0.23–0.27 |           | [3]       |
| Agricultural watersheds                                             |                     | Runoff              |      | 2.50–9.8 mg L <sup>-1</sup>    |                                                               | C1 - humic-like<br>C2 - protein-like                                                                 | C1 > C2                                     | N/A                                              | 0.01–0.02 | N/A       | N/A       |           | [4]       |
| Paddy amended soils with biochar produced from wheat straw          | soils               | Extract water       | with | 0.06–1.45 g kg <sup>-1</sup>   | 245 (265)/380 nm<br>220/410(420)<br>260(280)/440(480)         | C1 - tryptophan-like<br>C2 - UVA humic acid-like<br>C3 - UVC humic acid-like                         | 11–38%<br>42–48%<br>19–48%                  | 0.11–4.58                                        | 3.69–5.95 | 1.82–2.46 | 0.82–2.46 | 0.29–0.84 | [5]       |
| Various cropped and natural Chinese soils                           | cropped and natural | Extract water       | with | 0–0.36 mg g <sup>-1</sup>      | 265/460<br>230/400<br>320(250)/400<br>230(275)/330<br>220/330 | C1 - fulvic-like<br>C2 - fulvic-like<br>C3 - humic-like<br>C4 - tryptophan-like<br>C5 - peptide-like | 16–48%<br>15–41%<br>9–24%<br>7–24%<br>0–25% | 1.10–2.05                                        | N/A       | 1.57–1.91 | 0.70–0.92 | 0.61–0.88 | [6]       |
| Farmland amended soils with                                         | soils               | Extract water       | with | 83.99–144.2                    | 425/522                                                       | C1 - fulvic acid-like sub-                                                                           | C2 > C1 > C3                                | N/A                                              | N/A       | 0.84–0.96 | 0.99–1.03 | 5.11–6.10 | [7]       |

|                                             |                                       |  |                                |                  |                                                |                   |           |          |           |           |     |      |
|---------------------------------------------|---------------------------------------|--|--------------------------------|------------------|------------------------------------------------|-------------------|-----------|----------|-----------|-----------|-----|------|
| wheat straw<br>biochar                      |                                       |  | 7 mg kg <sup>-1</sup>          | 350/426          | stances<br>C2 - humic acid-like substances     |                   |           |          |           |           |     |      |
|                                             |                                       |  |                                | 205/324          | C3 - tryptophan-like substances                |                   |           |          |           |           |     |      |
| Loamy cropland soil                         | Runoff and fracture flow              |  | 0.40–84 mg L <sup>-1</sup>     | 270(380)/480     | C1 - terrestrial/ autochthonous UVA humic-like | N/A               | 2.9–10    | N/A      | 1.52–1.61 | 0.87–0.91 | N/A | [8]  |
|                                             |                                       |  |                                | 250(320)/410     | C2 - anthropogenic UVA humic-like              |                   |           |          |           |           |     |      |
| Semiarid agricultural soil                  | Extract with Water                    |  | 12.85–27.90 mg L <sup>-1</sup> | <240–250/390–440 | C1 - terrestrial humic-like                    | C4 > C2 > C3 > C1 | 0.76–1.96 | N/A      | N/A       | 2.22–2.98 | N/A | [9]  |
|                                             |                                       |  |                                | <240–275/455–540 | C2 - terrestrial humic-like                    |                   |           |          |           |           |     |      |
|                                             |                                       |  |                                | <240/303–312     | C3 - monolignol-like                           |                   |           |          |           |           |     |      |
|                                             |                                       |  |                                | <240/303–312     | C4- protein-/Tannin-like                       |                   |           |          |           |           |     |      |
| Agricultural soils amended with wheat straw | Extract with water                    |  | 0.13–0.34 g kg <sup>-1</sup>   | 340/435          | C1 - UVA/UVC humic-like                        | 42–67%            | 1.04–7.30 | 1.0–3.30 | 1.12–1.3  | 1.04–1.14 | N/A | [10] |
|                                             |                                       |  |                                | 280(420)/520     | C2 - fulvic acid-like                          | 26–32%            |           |          |           |           |     |      |
|                                             |                                       |  |                                | 215(270)/340     | C3 - tryptophan-like                           | 6–27%             |           |          |           |           |     |      |
| Wheat straw-derived biochar                 | Extract with water, alkaline and acid |  | 435–5000 mg kg <sup>-1</sup>   | 340/426          | C1 - terrestrial humic-like                    | 10–61%            | 0.2–78.9  | 1.8–4.4  | N/A       | 0.99–1.92 | N/A | [11] |
|                                             |                                       |  |                                | 395/474          | C2 - high molecular weight humic-like          | 20–66.4%          |           |          |           |           |     |      |
|                                             |                                       |  |                                | 465/518          | C3 - fulvic acid-like                          | 9–37.1%           |           |          |           |           |     |      |
|                                             |                                       |  |                                | 380(518)/590     | C4 - humic-like                                | 7–17.8%           |           |          |           |           |     |      |
|                                             |                                       |  |                                | 300(375)/490     | C5 - UVA humic acid-like                       | ~10.80%           |           |          |           |           |     |      |

|                                                                                                                              |                  |      |                                   |                                       |                                                        |         |           |           |           |            |           |      |  |
|------------------------------------------------------------------------------------------------------------------------------|------------------|------|-----------------------------------|---------------------------------------|--------------------------------------------------------|---------|-----------|-----------|-----------|------------|-----------|------|--|
|                                                                                                                              |                  |      |                                   | 200/294                               | C6 - trypto-<br>phan-like                              | 5–12.5% |           |           |           |            |           |      |  |
| Soil and sedi-<br>ments of agri-<br>cultural land                                                                            | Extract<br>water | with | 6.90–30.23<br>mg L <sup>-1</sup>  | 270/460                               | C1 - traditional<br>humic-like                         | N/A     | 3.07–4.70 | N/A       | 1.50–1.70 | 7.00–11.10 | 0.50–0.65 | [12] |  |
|                                                                                                                              |                  |      |                                   | 250/400                               | C2 - traditional<br>humic-like                         | N/A     |           |           |           |            |           |      |  |
|                                                                                                                              |                  |      |                                   | 220/426                               | C3 - hu-<br>mic-like                                   | N/A     |           |           |           |            |           |      |  |
| Soils of riparian<br>buffer wetland                                                                                          | Extract<br>water | with | 0.07–0.27 g<br>kg <sup>-1</sup>   | 250–260/<br>420–460                   | Peak A<br>-humic-like                                  | N/A     | N/A       | N/A       | 1.79–2.54 | >4         | 0.60–0.70 | [13] |  |
|                                                                                                                              |                  |      |                                   | 270–290/<br>320–350                   | Peak B<br>-Protein-like                                |         |           |           |           |            |           |      |  |
|                                                                                                                              |                  |      |                                   | 320–360/<br>400–450                   | Peak C<br>-Humic-like                                  |         |           |           |           |            |           |      |  |
|                                                                                                                              |                  |      |                                   | 225–230/<br>320–350                   | Peak T<br>-Protein-like                                |         |           |           |           |            |           |      |  |
|                                                                                                                              |                  |      |                                   |                                       |                                                        |         |           |           |           |            |           |      |  |
| Paddy field soils<br>under long-term<br>chemical ferti-<br>liser, crop straw,<br>manure, and<br>manure compost<br>amendments | Extract<br>water | with | 330–760 mg<br>kg <sup>-1</sup>    | 250(300)<br>/400–450                  | C1 - hu-<br>mic-like                                   | 38–53%  | 0.5–2.0   | N/A       | N/A       | N/A        | N/A       | [14] |  |
|                                                                                                                              |                  |      |                                   | 250(400(<br>/450–500                  | C2 - hu-<br>mic-like                                   | 14–20 % |           |           |           |            |           |      |  |
|                                                                                                                              |                  |      |                                   | 300–350/<br>350–400                   | C3 - microbial<br>humic-like                           | 6–13%   |           |           |           |            |           |      |  |
|                                                                                                                              |                  |      |                                   | 250–300/<br>300–350                   | C4 - tyro-<br>sine-like                                | 14–29%  |           |           |           |            |           |      |  |
|                                                                                                                              |                  |      |                                   | 250–300/<br>350                       | C5 - trypto-<br>phan-like                              | 4–8%    |           |           |           |            |           |      |  |
| Straw of canola<br>and oilseed rape                                                                                          | Extract<br>water | with | 779–857 mg<br>L <sup>-1</sup>     | N/A                                   | N/A                                                    | N/A     | 0.97–3.13 | N/A       | 1.5–1.8   | 0.80–1.20  |           | [15] |  |
| Cattle manure<br>and corn straw<br>compost                                                                                   | Extract<br>water | with | N/A                               | 215–225<br>(275–28<br>0)/330(3<br>30) | C1 - trypto-<br>phan-like                              | N/A     | 0.15–0.55 | 0.20–0.37 | N/A       | N/A        | N/A       | [16] |  |
|                                                                                                                              |                  |      |                                   | 225(280)<br>/340<br>240(320)<br>/420  | C2 - hu-<br>mic-like<br>C3 - terrestrial<br>humic-like |         |           |           |           |            |           |      |  |
| Frequently<br>submerged ag-<br>ricultural soils                                                                              | Extract<br>water | with | 7.80–16%                          | N/A                                   | N/A                                                    | N/A     | 1.07–1.50 | N/A       | 1.54–1.72 | 3.66–7.91  | 0.62–0.92 | [17] |  |
| Fresh biochar<br>and long-term<br>biochar amend-<br>ed agricultural                                                          | Extract<br>water | with | 14.14–84.18<br>mg L <sup>-1</sup> | N/A                                   | N/A                                                    | N/A     | 1.23–4.68 | 1.28–5.70 | 1.13–1.72 | 5.33–14.65 | N/A       | [18] |  |

|                                                                                                                  |               |      |                                |                |                                        |             |           |     |     |           |     |      |
|------------------------------------------------------------------------------------------------------------------|---------------|------|--------------------------------|----------------|----------------------------------------|-------------|-----------|-----|-----|-----------|-----|------|
| soils                                                                                                            |               |      |                                |                |                                        |             |           |     |     |           |     |      |
| Biochar derived from chicken, pig, cow, and sheep manure                                                         | Extract water | with | 4.57–18.70 g kg <sup>-1</sup>  | 310/404        | C1 - marine humic-like                 | 8–41%       | 4.75–7.18 | N/A | N/A | 7.0–25.87 | N/A | [19] |
|                                                                                                                  |               |      |                                | 350/436        | C2 - UVA humic-like                    | 8–33%       |           |     |     |           |     |      |
|                                                                                                                  |               |      |                                | 340/383        | C3 - microbial by-product              | 10–43%      |           |     |     |           |     |      |
|                                                                                                                  |               |      |                                | 260 (400)/490  | C4 - UVC + UVA humic-like              | 7–15%       |           |     |     |           |     |      |
| Composted pig and cattle manure with sawdust and corn stalks                                                     | Extract water | with | 20–85 kg <sup>-1</sup>         | 230(275)/330   | C4 - tryptophan-like                   | 7–24        | N/A       | N/A | N/A | N/A       | N/A | [20] |
|                                                                                                                  |               |      |                                | 220/330        | C5 - peptide like                      | 0–25%       |           |     |     |           |     |      |
|                                                                                                                  |               |      |                                | 245/399nm      | C3 - soluble microbial by-product-like | 26.30–40%   |           |     |     |           |     |      |
|                                                                                                                  |               |      |                                | 245/400nm      | C4 - fulvic-like                       | 10.9–18.10% |           |     |     |           |     |      |
| Biochars produced from soybean, stover, garlic stem, rice husk, tea waste, perilla, wood pine chip, and oak wood | Extract water | with | 0.40–659 mg L <sup>-1</sup>    | 260(340)/430   | C1 - humic-like                        | 6–37%       | N/A       | N/A | N/A | N/A       | N/A | [21] |
|                                                                                                                  |               |      |                                | 220(280)/370   | C2 - protein-/tannin-like              | 5–100%      |           |     |     |           |     |      |
|                                                                                                                  |               |      |                                | 260/440        | C3 - Fulvic acid-like                  | 17–67%      |           |     |     |           |     |      |
|                                                                                                                  |               |      |                                | 270(350)/490   | C4 - terrestrial humic-like            | 9–37%       |           |     |     |           |     |      |
| Biochar produced from sawmill waste feedstocks                                                                   | Extract water | with | 14.99–37.20 mg L <sup>-1</sup> | <250 (280)/390 | C1 - microbial humic-like              | 27–38%      | 0.70–6.0  | N/A | N/A | N/A       | N/A | [22] |
|                                                                                                                  |               |      |                                | 250(320)/435   | C2 - fulvic/humic-like                 | 22–31%      |           |     |     |           |     |      |
|                                                                                                                  |               |      |                                | 260/315        | C3 - protein-like (tyrosine-like)      | 25–45%      |           |     |     |           |     |      |
|                                                                                                                  |               |      |                                | 290 (350)/525  | C4 - soil humic-like                   | 4.5–7.0%    |           |     |     |           |     |      |

|                                                                                                        |                                                                                                   |      |                               |                                                                                                                     |                                                                                                                                                                     |                                               |          |     |     |     |     |      |
|--------------------------------------------------------------------------------------------------------|---------------------------------------------------------------------------------------------------|------|-------------------------------|---------------------------------------------------------------------------------------------------------------------|---------------------------------------------------------------------------------------------------------------------------------------------------------------------|-----------------------------------------------|----------|-----|-----|-----|-----|------|
| Biochars produced from sewage, soy-bean, rice, and peanut                                              | Extract water                                                                                     | with | 17.60–53.8 mg L <sup>-1</sup> | 230–250/<br>390–425<br><br>305–310/<br>405–425                                                                      | Peak A - humic acid/marine humic<br><br>Peak B - humic acid/marine humic substances                                                                                 | N/A                                           | 0.1~1.25 | N/A | N/A | N/A | N/A | [23] |
| Biochars produced from almond shell, broiler litter, lignin, cotton-seed hull, and pecan shell         | Extract water                                                                                     | with | 0–15692 mg L <sup>-1</sup>    | 240(300)/420<br>250<br>(300)/430<br>250<br>(350)/470<br>340/380<br><br>220(280)/340                                 | C1 - fulvic-like<br><br>C2 - UVC humic-/ marine humic-like<br>C3 - UVC and UVA hu-mic-like<br>C4 - microbial decomposition products<br>C5 - pro-tein-like moie-ties | 8–83%<br><br>3–35%<br>4–43%<br>3–59%<br>3–60% | N/A      | N/A | N/A | N/A | N/A | [24] |
| Agricultural soils amended with biochar                                                                | Extract CaCl <sub>2</sub> , Na <sub>4</sub> P <sub>2</sub> O <sub>7</sub> , and tolu-ene/methanol | with | 156–201 mg L <sup>-1</sup>    | 240(320–340)/400–420<br>260–280<br>(340)/460<br>220(280)/340<br>200/294                                             | C1 - pro-tein-like<br><br>C2 - hu-mic-like<br><br>C1 - pro-tein-like<br>C6- trypto-phan-like                                                                        | 15–53%<br><br>18–27%<br>17–63%<br>5–12.5%     | N/A      | N/A | N/A | N/A | N/A | [25] |
| Leaf litters from <i>Populus simo-nii</i> , <i>Artemisia desertorum</i> , and <i>Salix cheilophila</i> | Extract water                                                                                     | with | 1588–2544 mg L <sup>-1</sup>  | 210–245/390–425<br>295–315<br>/415–435<br>275–280<br>(220–225)/300–320<br>(295–310 nm)<br>275<br>(225)/345<br>(345) | C1 - fulvic acid-like<br><br>C2 - humic acid-like<br>C3 - pro-tein-like<br><br>C4 - pro-tein-like                                                                   | N/A<br>N/A<br>N/A<br>N/A                      | N/A      | N/A | N/A | N/A | N/A | [26] |

BIX: Biological index is an indicator of the relative contribution of the recently microbially produced DOM, i.e., the ratio of albuminoid and biological components; FI: Fluorescence index is used as an indicator of DOM source to infer the relative microbial ( $> 1.9$ ) or terrestrial plant ( $< 1.4$ ) contribution to DOM; HIX: Humification index reflects the degree of humification, vital complexity and condensation (H/C ratios) of terrigenous contribution ( $> 10$ ); Slope R: slope ratio is the ratio in the shorter UV wavelength region (275–295 nm) relative to that in the longer UV wavelength region (350–400 nm), reflecting molecular weight and source of DOM; SUVA<sub>254</sub>: specific UV-visible absorbance indicates the aromaticity of DOM (SUVA<sub>254</sub>  $< 3$  indicates the hydrophilic fractions, whereas SUVA<sub>254</sub>  $> 4$  indicates the aromatic and hydrophobic fractions).

## References

1. Musadji, N.Y.; Lemée, L.; Caner, L.; Porel, G.; Poinot, P.; Geffroy-Rodier, C. Spectral characteristics of soil dissolved organic matter: Long-term effects of exogenous organic matter on soil organic matter and spatial-temporal changes. *Chemosphere* **2020**, *240*, 124808.
2. Tye, A.M.; Lapworth, D.J. Characterising changes in fluorescence properties of dissolved organic matter and links to N cycling in agricultural floodplains. *Agr. Ecosyst. Environ.* **2016**, *221*, 245–257.
3. Jia, W.; Zhao, X.-H.; Zhao, Y.-Y.; Xu, J.-Y.; Ming, J.-J.; Cai, M.-M.; Hu, C.-X. Variation in spectral characteristics of dissolved organic matter derived from rape straw of plants grown in Se-amended soil. *J. Integr. Agr.* **2020**, *19*, 1876–1884.
4. Eckard, R.S.; Pellerin, B.A.; Bergamaschi, B.A.; Bachand, P.A.M.; Bachand, S.M.; Spencer, R.G.M.; Hernes, P.J. Dissolved Organic Matter Compositional Change and Biolability During Two Storm Runoff Events in a Small Agricultural Watershed. *J. Geophys. Res.-Biogeo.* **2017**, *122*, 2634–2650.
5. Gao, J.; Shi, Z.; Wu, H.; Lv J. Fluorescent characteristics of dissolved organic matter released from biochar and paddy soil incorporated with biochar. *RSC Adv.* **2020**, *10*, 5785–5793.
6. Li, S.; Li, M.; Wang, G.; Sun, X.; Xi, B.; Hu, Z. Compositional and chemical characteristics of dissolved organic matter in various types of cropped and natural Chinese soils. *Chem. Biol. Technol. Ag.* **2019**, *6*, 20.
7. Zhang, A.; Zhou, X.; Li, M.; Wu, H. Impacts of biochar addition on soil dissolved organic matter characteristics in a wheat-maize rotation system in Loess Plateau of China. *Chemosphere* **2017**, *186*, 986–993.
8. Xian, Q.; Li, P.; Liu, C.; Cui, J.; Guan, Z.; Tang, X. Concentration and spectroscopic characteristics of DOM in surface runoff and fracture flow in a cropland plot of a loamy soil. *Sci. Total Environ.* **2018**, *622–623*, 385–393.
9. Romero, C.M.; Engel, R.E.; D'Andrilli, J.; Chen, C.; Zabinski, C.; Miller, P.R.; Wallander, R. Bulk optical characterization of dissolved organic matter from semiarid wheat-based cropping systems. *Geoderma* **2017**, *306*, 40–49.
10. Gao, J.; Lv, J.; Wu, H.; Dai, Y.; Nasir, M. Impacts of wheat straw addition on dissolved organic matter characteristics in cadmium-contaminated soils: Insights from fluorescence spectroscopy and environmental implications. *Chemosphere* **2018**, *193*, 1027–1035.
11. Li, M.; Zhang, A.; Wu, H.; Liu, H.; Lv, J. Predicting potential release of dissolved organic matter from biochars derived from agricultural residues using fluorescence and ultraviolet absorbance. *J. Hazard. Mater.* **2017**, *334*, 86–92.
12. Liu, C.; Li, Z.; Berhe, A.A.; Xiao, H.; Liu, L.; Wang, D.; Peng, H.; Zeng, G. Characterizing dissolved organic matter in eroded sediments from a loess hilly catchment using fluorescence EEM-PARAFAC and UV–Visible absorption: Insights from source identification and carbon cycling. *Geoderma* **2019**, *334*, 37–48.
13. Wang, Y.-L.; Yang, C.-M.; Zou, L.-M.; Cui, H.-Z. Spatial distribution and fluorescence properties of soil dissolved organic carbon across a riparian buffer wetland in Chongming Island, China. *Pedosphere* **2015**, *25*, 220–229.
14. Wu, H.; Kida, M.; Domoto, A.; Hara, M.; Ashida, H.; Suzuki, T.; Fujitake, N. The effects of fertilization treatments and cropping systems on long-term dynamics and spectroscopic characteristics of dissolved organic matter in paddy soil. *Soil Sci. Plant Nutr.* **2019**, *65*, 557–565.
15. Wang, B.; Li, M.; Zhang, H.; Zhu, J.; Chen, S.; Ren, D. Effect of straw-derived dissolved organic matter on the adsorption of sulfamethoxazole to purple paddy soils. *Ecotox. Environ. Saf.* **2020**, *203*, 110990.
16. Chen, Y.; Jiang, Z.; Zhang, X.; Cao, B.; Yang, F.; Wang, Z.; Zhang, Y. Variation in the Humification Degree of Dissolved Organic Matter from Cattle Manure during Composting as Analyzed by Ultraviolet-Visible and Fluorescence Spectroscopy. *J. Environ. Qual.* **2017**, *46*, 1489–1499.

17. Jiang, T.; Kaal, J.; Liang, J.; Zhang, Y.; Wei, S.; Wang, D.; Green, N.W. Composition of dissolved organic matter (DOM) from periodically submerged soils in the Three Gorges Reservoir areas as determined by elemental and optical analysis, infrared spectroscopy, pyrolysis-GC-MS and thermally assisted hydrolysis and methylation. *Sci. Total Environ.* **2017**, *603-604*, 461-471.
18. Cai, W.; Du, Z.-L.; Zhang, A.-P.; He, C.; Shi, Q.; Tian, L.-Q.; Zhang, P.; Li, L.-P.; Wang, J.-J. Long-term biochar addition alters the characteristics but not the chlorine reactivity of soil-derived dissolved organic matter. *Water Res.* **2020**, *185*, 116260.
19. Peng, N.; Wang, K.; Tu, N.; Liu, Y.; Li, Z. Fluorescence regional integration combined with parallel factor analysis to quantify fluorescent spectra for dissolved organic matter released from manure biochars. *RSC Adv.* **2020**, *10*, 31502-31510.
20. Zhang, F.; Li, Y.; Xiong, X.; Yang, M.; Li, W. Effect of Composting on Dissolved Organic Matter in Animal Manure and Its Binding with Cu. *Sci. World J.* **2012**, *2012*, 289896.
21. Rajapaksha, A.U.; Ok, Y.S.; El-Naggar, A.; Kim, H.; Song, F.; Kang, S.; Tsang, Y.F. Dissolved organic matter characterization of biochars produced from different feedstock materials. *J. Environ. Manage.* **2019**, *233*, 393-399.
22. Jamieson, T.; Sager, E.; Guéguen, C. Characterization of biochar-derived dissolved organic matter using UV-visible absorption and excitation-emission fluorescence spectroscopies. *Chemosphere* **2014**, *103*, 197-204.
23. Tang, J.; Li, X.; Luo, Y.; Li, G.; Khan, S. Spectroscopic characterization of dissolved organic matter derived from different biochars and their polycyclic aromatic hydrocarbons (PAHs) binding affinity. *Chemosphere* **2016**, *152*, 399-406.
24. Uchimiya, M.; Ohno, T.; He, Z. Pyrolysis temperature-dependent release of dissolved organic carbon from plant, manure, and biorefinery wastes. *J. Anal. Appl. Pyrol.* **2013**, *104*, 84-94.
25. Uchimiya, M.; Liu, Z.; Sistani, K. Field-scale fluorescence fingerprinting of biochar-borne dissolved organic carbon. *J. Environ. Manage.* **2016**, *169*, 184-190.
26. Zhao, L.; Du, C.; Zhang, Q.; Sun, C.; Wang, S.; Luo, S. The ultraviolet-visible absorbance and fluorescence characterization of dissolved organic matter derived from the leaf litter of *Populus simonii*, *Artemisia desertorum*, *Salix cheilophila*, and *Populus tomentosa*. *Environ. Sci. Pollut. Res.* **2020**, *27*, 36439-36449.
